# Supplementary material
Source: PubMed Central journal article supplement (PMC3058954)
Supplement: supp_M110.213330_jbc.M110.213330-1.pdf [file supp_M110.213330_jbc.M110.213330-1.pdf]

**Supplement material**

**DIRECT RECRUITMENT OF ERK CASCADE COMPONENTS TO INDUCIBLE  
GENES IS REGULATED BY THE HETEROGENEOUS NUCLEAR  
RIBONUCLEOPROTEIN K (HNRNP K)**

**Michal Mikula<sup>1,2</sup>, Karol Bomsztyk<sup>1</sup>**

<sup>1</sup>Department of Medicine, University of Washington, Seattle, WA, 98109, USA,

<sup>2</sup>Department of Oncological Genetics, Maria Sklodowska-Curie Memorial Cancer Center and  
Institute of Oncology, Warsaw, Poland

Running title: hnRNP K and ERK cascade at inducible genes

Address for correspondence:

Karol Bomsztyk

UW Medicine Lake Union, Box 358050

University of Washington,

Seattle, WA 98109 USA

E-mail: [karolb@u.washington.edu](mailto:karolb@u.washington.edu)

Tel: 206-616-7949

Fax: 206-616-8591

Fig.S1

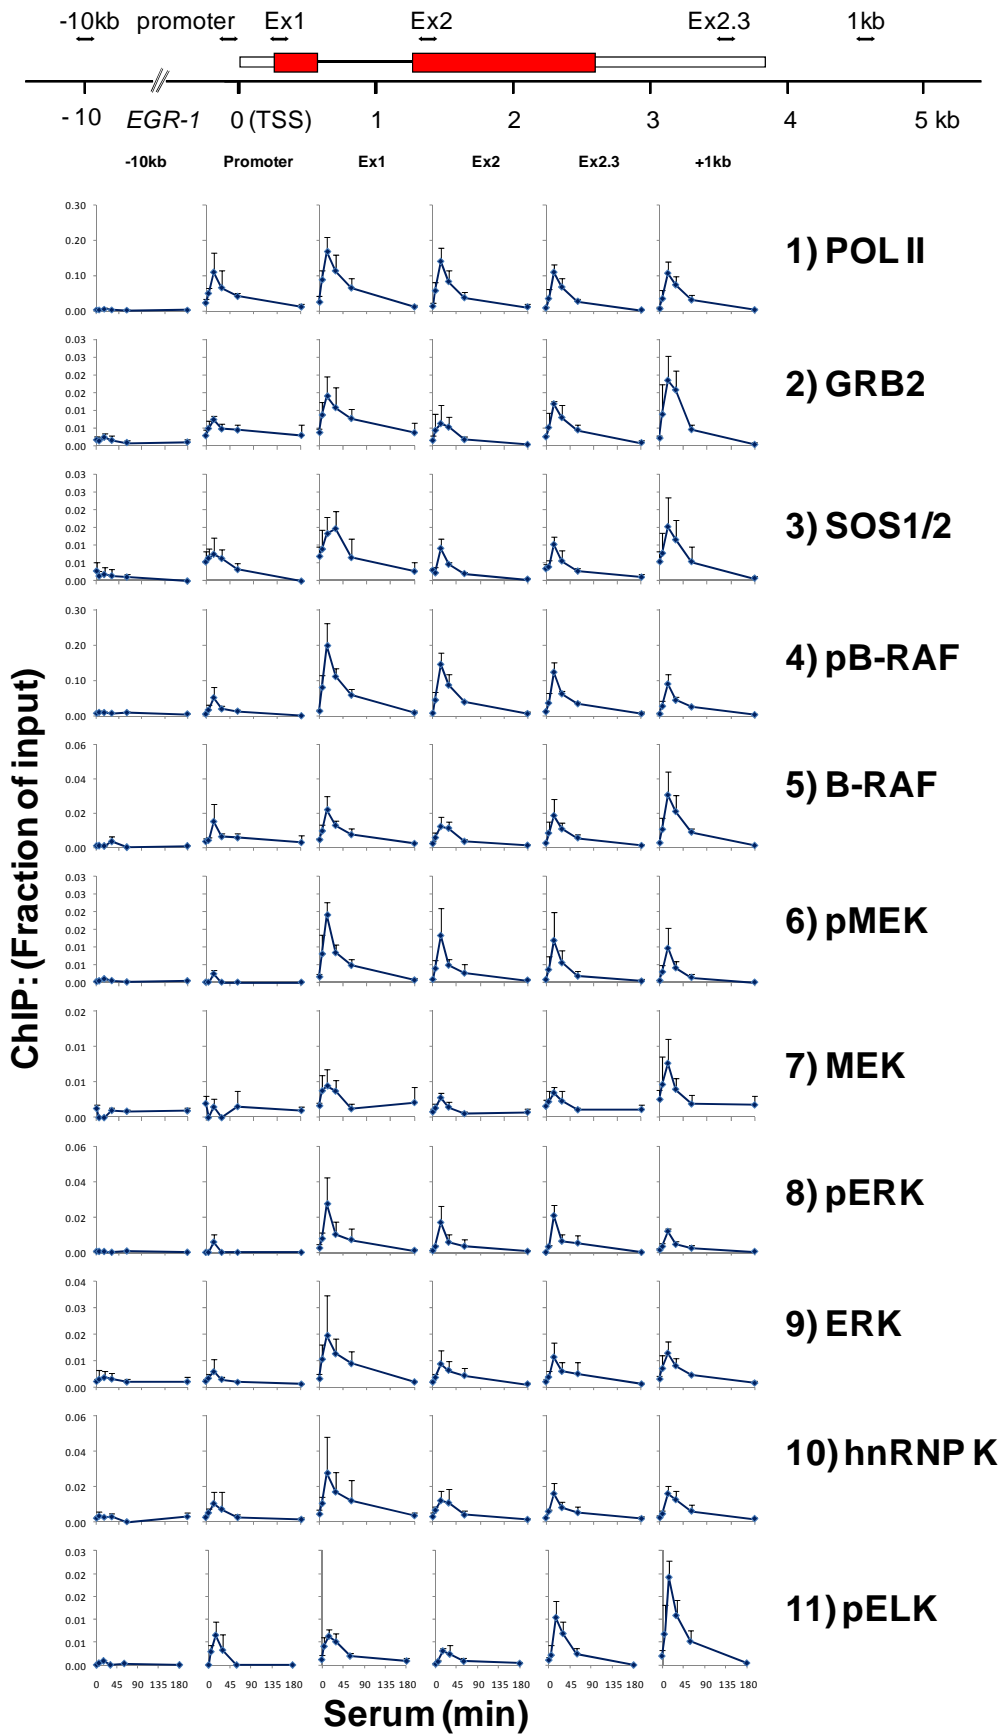

Fig.S2

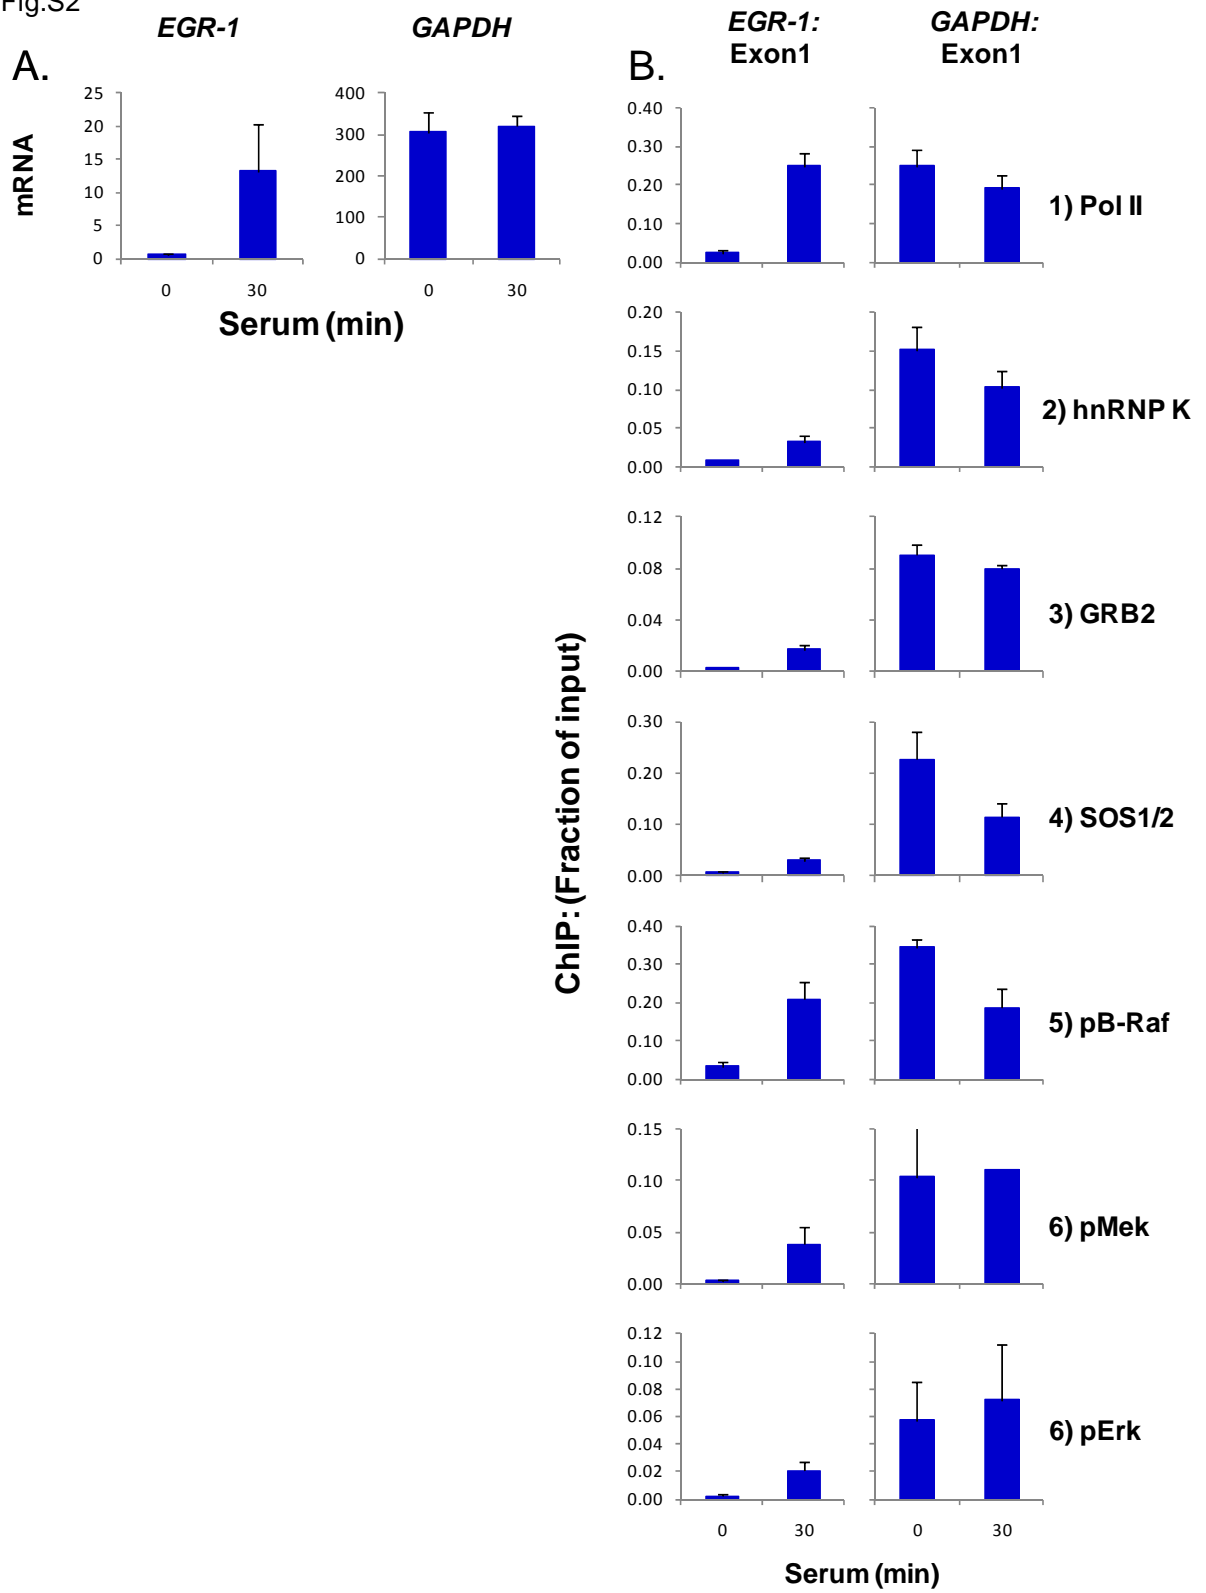

Fig.S3

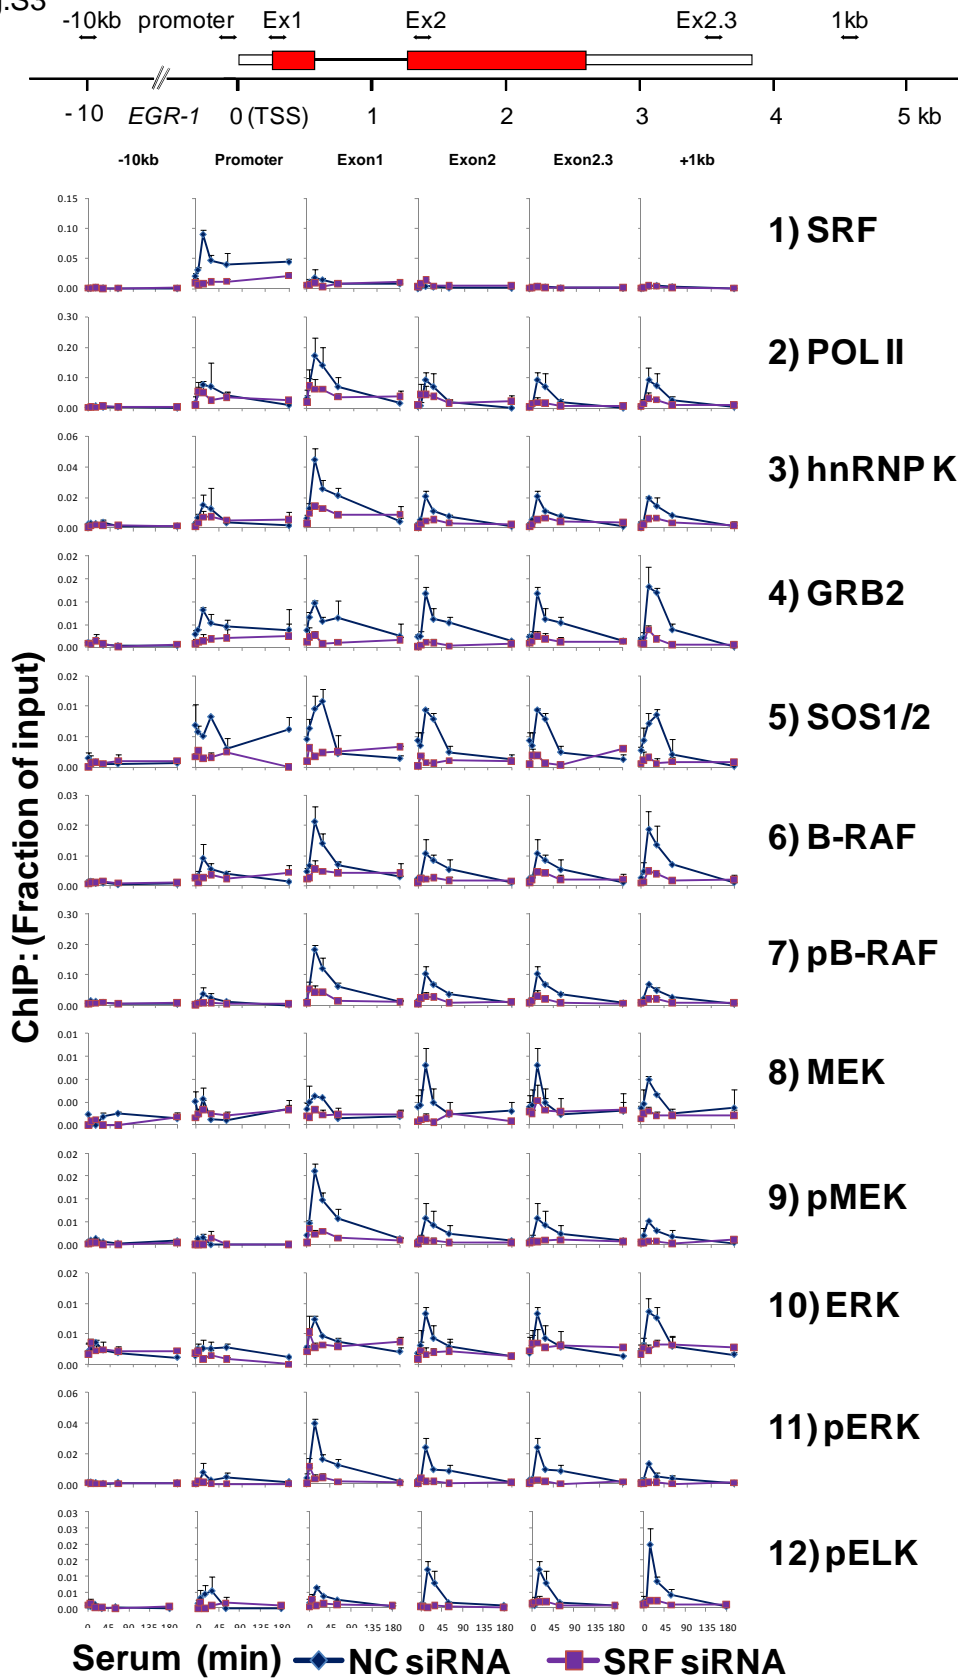

Fig.S4

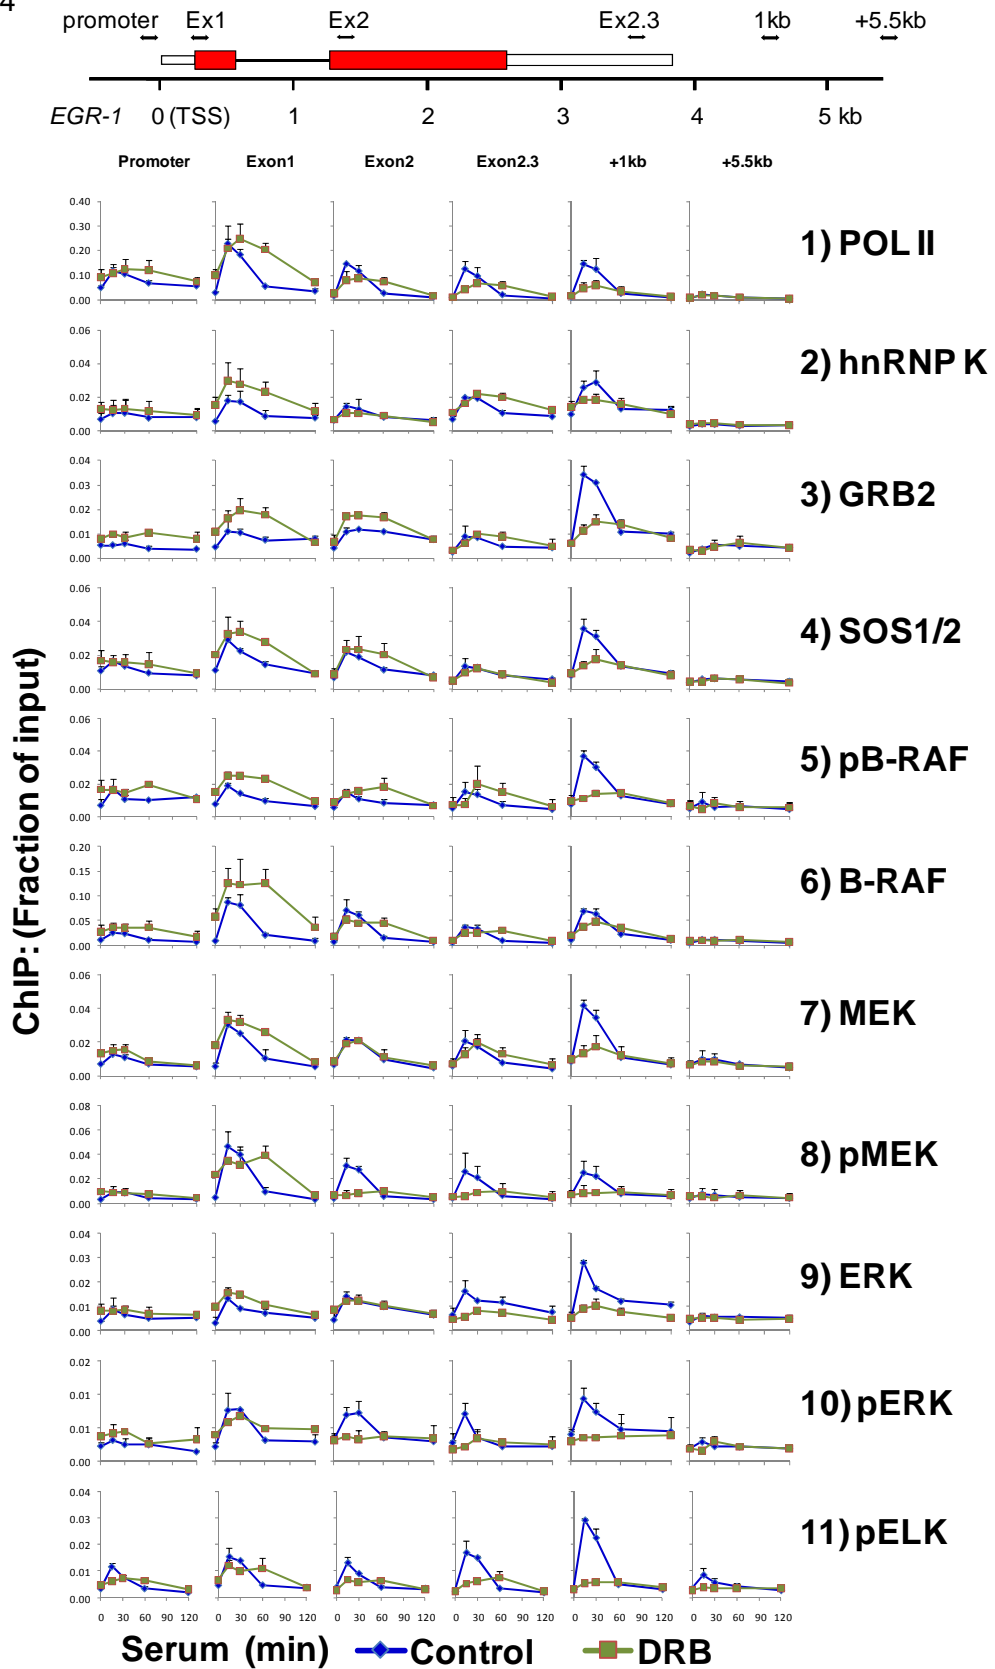

Fig.S5

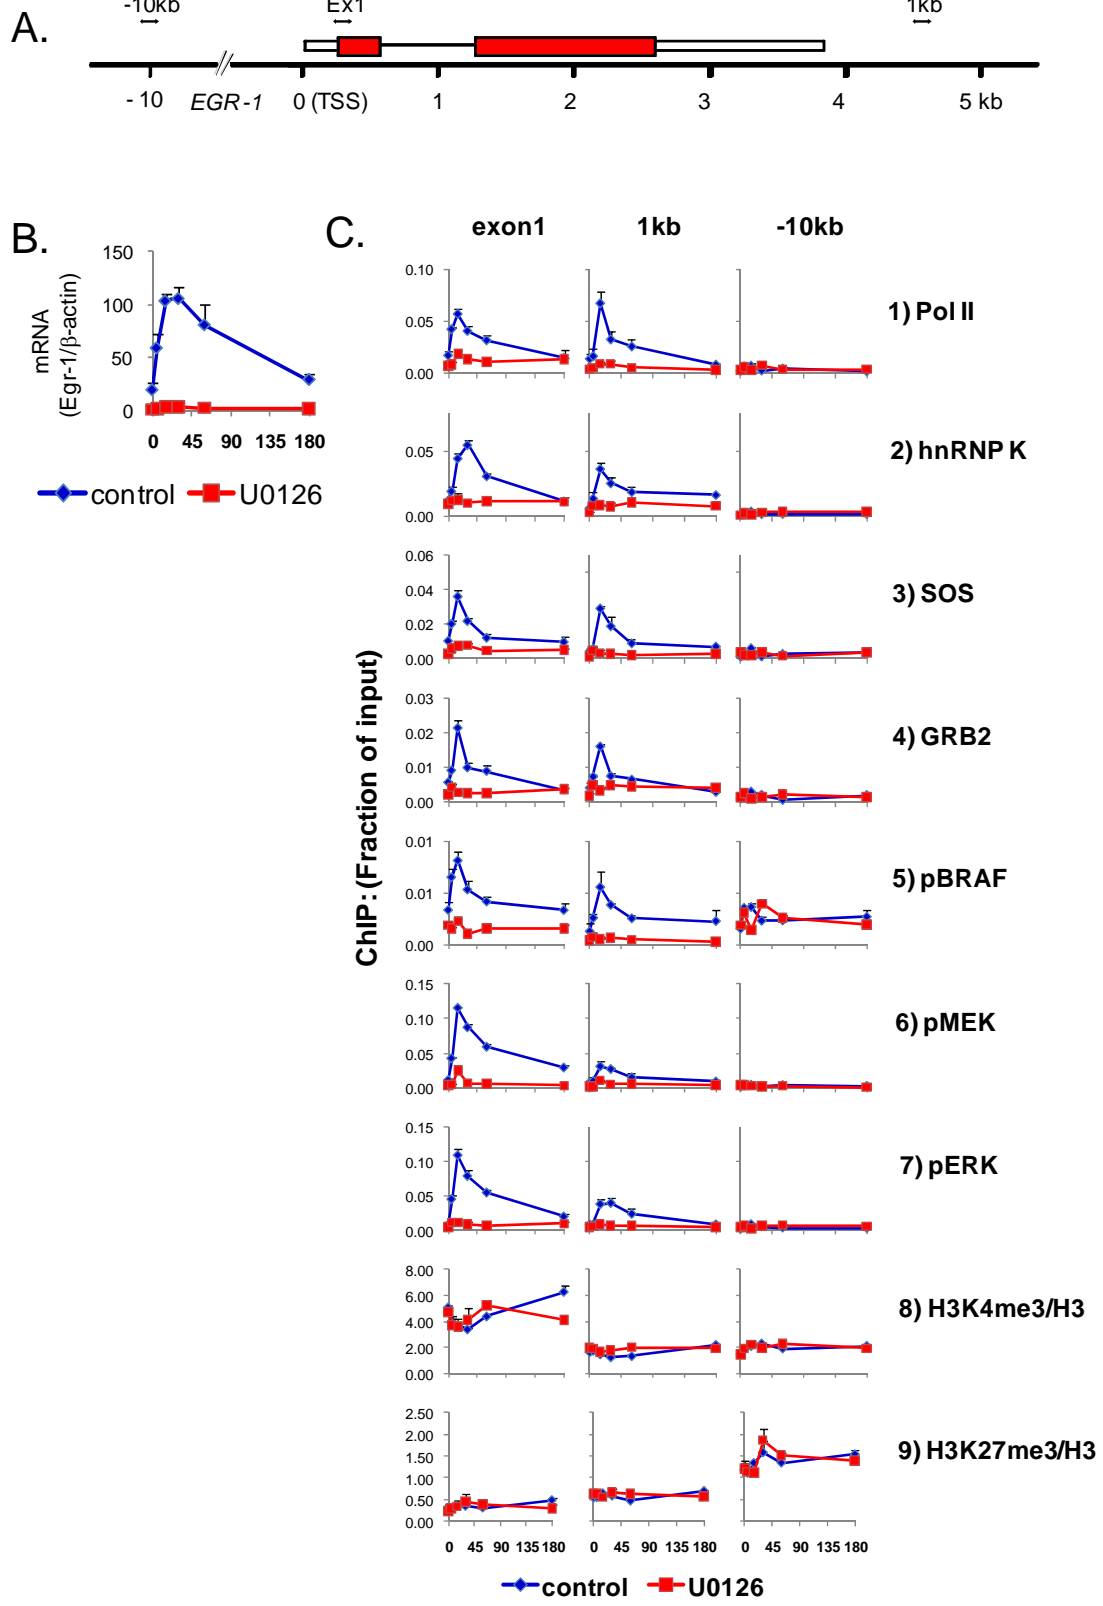

## Supplement figure legends

**Fig.S1. Graph grid of time-course binding profile of ERK cascade components, hnRNP K and Pol II along the serum-induced *EGR-1* gene.** Matrix ChIP analysis of sheared chromatin from a time-course of serum-treated (10%FBS for 0, 5, 15, 30, 60, 180 min) HCT116 WT human colon carcinoma cells was done using in-lab coated Protein A polypropylene 96-well plates. The antibodies used are listed in Table.1. Real-time PCR was done using primers to the regions shown in the diagram of the *EGR-1* gene (the two exons are shown as boxes). The primers are listed in Table. 2. The ChIP results are expressed as fraction of input DNA. The graphs represent mean $\pm$ SEM from six experiments.

**Fig.S2. High constitutive levels of Pol II, hnRNP and ERK cascade components at the highly expressed house-keeping GAPDH gene.** Quantitative RT-PCR analysis of mRNA (A) and Matrix ChIP (B) was done in untreated and serum-treated (30min) HCT116 WT human colon carcinoma cells. The primers are listed in Table 2. The graphs represent mean $\pm$ SEM from three experiments.

**Fig.S3. siRNA SRF knockdown inhibits serum-induced co-recruitment of Pol II, hnRNP K and ERK signaling cassette along the *EGR-1* locus.** Cells were transfected using Lipofectamine RNAiMAX with either SRF siRNA or non-complementary (NC) siRNA. 24hrs after transfection cells were switched to low serum medium and 24hrs after quiescence cells were treated with 10%FBS for 0, 5, 15, 30, 60 and 180 min. Matrix ChIP data are presented as a fraction of input DNA, means $\pm$ SEM, n=3 experiments.

**Fig.S4. DRB-inhibited Pol II elongation decreases serum-induced levels of hnRNP K and ERK signaling cassette along *EGR-1* regions distal to TSS.** HCT116 WT cells grown to 40%–60% confluence were made quiescent overnight by lowering FBS concentration in the medium from 10% to 0.5 %. After 24hrs cells were pretreated with DRB (50 $\mu$ M dissolved in DMSO) in 0.5 % FBS media for 6h. DMSO alone was used as control. Cells were switched to 10%FBS media for 0, 15, 30, 60 and 120min, at which times they were cross-linked, chromatin was sheared. Matrix ChIP data are presented as fraction of input DNA, means $\pm$ SEM, n=3 experiments.

**Fig.S5. 1,4-Diamino-2,3-dicyano-1,4-bis(methylthio)butadiene (U0126) [1,2] blocks serum-induced *EGR-1* mRNA expression and recruitment of Pol II, hnRNP K and ERK cascade components to the *egr-1* gene.** HCT116 WT cells were grown in 6-well plates to 40%–60% confluence then made quiescent overnight by lowering FBS concentration in the medium to 1%. After 24hrs cells were pretreated with 10nM U0126 (Sigma; 10 $\mu$ M stock suspended in DMSO) in 1% FBS media for 1h. A 0.1% DMSO alone was used as a control. Cells were switched to 10% FBS media containing either DMSO or inhibitor for 0, 5, 15, 30, 60 and 180min, at which times they were immediately overlaid with Trizol (for RNA isolation) (A) or cross-linked with 1% formaldehyde followed by 125mM Glycine incubation for chromatin isolation (B). A. Total RNA was extracted from cells as described previously [3]. 1  $\mu$ g of RNA was used in reverse transcription (RT) reaction carried out using random hexamers. Levels of *EGR-1* mRNA were assessed by real-time RT-PCR, normalized for  $\beta$ -Actin transcript and expressed as fold change of a U0126 0' time point sample. Data represent mean $\pm$ SEM, n=3 experiments. B. Matrix ChIP data are presented as fraction of input DNA or as ratios of modified histone marks to total H3 ChIP signals, means $\pm$ SEM, n=2 experiments.

References:

1. Gupta P, Prywes R (2002) ATF1 Phosphorylation by the ERK MAPK Pathway Is Required for Epidermal Growth Factor-induced c-jun Expression. *J Biol Chem* 277: 50550-50556.
2. Kamakura S, Moriguchi T, Nishida E (1999) Activation of the protein kinase ERK5/BMK1 by receptor tyrosine kinases. Identification and characterization of a signaling pathway to the nucleus. *J Biol Chem* 274: 26563-26571.
3. Ostrowski J, Kawata Y, Schullery DS, Denisenko ON, Bomsztyk K (2003) Transient recruitment of the hnRNP K protein to inducibly transcribed gene loci. *Nucleic Acids Res* 31: 3954-3962.
